# Supplementary material for: Association between physician US News & World Report medical school ranking and patient outcomes and costs of care: observational study
Source: PubMed Central journal article supplement — BMJ. 2018 Sep 26;362:k3640. doi: 10.1136/bmj.k3640 (PMC6156557; doi:10.1136/bmj.k3640), 2018-09-26
Supplement: jena044856.wt1.pdf [file jena044856.wt1.pdf]

**Supplementary Online Content for “Association between physician *U.S. News & World Report* medical school ranking and patient outcomes and costs of care: observational study”**

**eTable 1.** *U.S. News & World Report* rankings

**(A)** Research rankings

| 2002 |                                                 | 2009 |                                                 |
|------|-------------------------------------------------|------|-------------------------------------------------|
| Rank | School                                          | Rank | School                                          |
| 1    | Harvard University                              | 1    | Harvard University                              |
| 2    | Johns Hopkins University                        | 2    | Johns Hopkins University                        |
| 3    | Duke University                                 | 3    | Washington University in St. Louis              |
| 4    | University of Pennsylvania                      | 4    | University of Pennsylvania                      |
| 4    | Washington University in St. Louis              | 5    | University of California- San Francisco         |
| 6    | Columbia U. College of Physicians and Surgeons  | 6    | Duke University                                 |
| 7    | University of California- San Francisco         | 6    | University of Washington                        |
| 8    | Yale University                                 | 8    | Stanford University                             |
| 9    | Stanford University                             | 9    | University of California- Los Angeles           |
| 9    | University of Michigan                          | 9    | Yale University                                 |
| 11   | Baylor College of Medicine                      | 11   | Columbia U. College of Physicians and Surgeons  |
| 11   | Cornell University (Weill)                      | 11   | University of Michigan                          |
| 11   | University of Washington                        | 13   | Baylor College of Medicine                      |
| 14   | University of California- Los Angeles           | 14   | University of California- San Diego             |
| 15   | Mayo Medical School                             | 14   | University of Pittsburgh                        |
| 16   | Vanderbilt University                           | 16   | University of Chicago                           |
| 17   | Case Western Reserve University                 | 16   | Vanderbilt University                           |
| 17   | University of Chicago                           | 18   | Cornell University (Weill)                      |
| 17   | U. of Texas Southwestern Medical Center- Dallas | 19   | University of North Carolina- Chapel Hill       |
| 20   | Northwestern University                         | 20   | Emory University                                |
| 20   | University of Pittsburgh                        | 20   | Northwestern University                         |
| 22   | Emory University                                | 22   | U. of Texas Southwestern Medical Center- Dallas |
| 23   | Mount Sinai School of Medicine                  | 23   | Case Western Reserve University                 |
| 24   | New York University                             | 23   | Mayo Medical School                             |
| 24   | University of California- San Diego             | 23   | Mount Sinai School of Medicine                  |
| 24   | University of North Carolina- Chapel Hill       | 23   | University of Virginia                          |
| 27   | University of Alabama-Birmingham                | 27   | University of Alabama-Birmingham                |
| 28   | University of Virginia                          | 27   | University of Colorado- Denver                  |
| 29   | University of Iowa                              | 27   | University of Wisconsin-Madison                 |
| 30   | University of Wisconsin-Madison                 | 30   | Ohio State University                           |
| 31   | University of Rochester                         | 31   | Brown University                                |
| 32   | Yeshiva University (Einstein)                   | 31   | Dartmouth Medical School                        |
| 33   | University of Colorado Health Sciences Center   | 31   | University of Iowa                              |
| 34   | Dartmouth Medical School                        | 34   | New York University                             |
| 35   | Oregon Health Sciences University               | 35   | Oregon Health Sciences University               |
| 35   | University of Minnesota- Twin Cities            | 36   | University of Minnesota Medical School          |
| 37   | Boston University                               | 36   | University of Rochester                         |
| 37   | Tufts University                                | 36   | University of Southern California               |
| 39   | University of Utah                              | 36   | Yeshiva University                              |
| 40   | Brown University                                | 40   | Georgetown University                           |
| 40   | Ohio State University                           | 40   | University of Cincinnati                        |
| 40   | University of Florida                           | 42   | Wake Forest University                          |
| 43   | Georgetown University                           | 43   | Boston University                               |
| 43   | Indiana University- Indianapolis                | 43   | University of California- Irvine                |
| 43   | University of Maryland                          | 43   | University of Maryland                          |
| 43   | University of Southern California               | 46   | Indiana University- Indianapolis                |
| 43   | Wake Forest University                          | 46   | Tufts University                                |
| 48   | University of Cincinnati                        | 48   | University of California- Davis                 |
| 48   | University of Massachusetts- Worcester          | 48   | University of Florida                           |
| 50   | Jefferson Medical College                       | 50   | University of Utah                              |
| 50   | Medical College of Wisconsin                    |      |                                                 |

(B) Primary care rankings

| 2002 |                                               | 2009 |                                                 |
|------|-----------------------------------------------|------|-------------------------------------------------|
| Rank | School                                        | Rank | School                                          |
| 1    | University of Washington                      | 1    | University of Washington                        |
| 2    | Oregon Health Science University              | 2    | Oregon Health Science University                |
| 3    | University of New Mexico                      | 2    | University of North Carolina- Chapel Hill       |
| 4    | University of California- San Francisco       | 4    | University of Colorado- Denver                  |
| 4    | University of Massachusetts- Worcester        | 5    | University of Vermont                           |
| 6    | Michigan State University                     | 6    | University of California- San Francisco         |
| 6    | University of North Carolina- Chapel Hill     | 7    | Baylor College of Medicine                      |
| 8    | University of Colorado Health Sciences Center | 7    | Harvard University                              |
| 8    | University of Iowa                            | 7    | Michigan State University                       |
| 8    | University of Minnesota- Duluth               | 7    | University of Iowa                              |
| 11   | Harvard University                            | 7    | University of Minnesota Medical School          |
| 11   | University of Minnesota- Twin Cities          | 12   | University of California- Los Angeles           |
| 11   | University of Missouri- Columbia              | 13   | Dartmouth Medical School                        |
| 14   | Case Western Reserve University               | 13   | University of Massachusetts- Worcester          |
| 14   | University of Rochester                       | 13   | University of Wisconsin- Madison                |
| 14   | University of Wisconsin- Madison              | 13   | Washington University in St. Louis              |
| 17   | East Carolina University (Brody)              | 17   | East Carolina University (Brody)                |
| 17   | Johns Hopkins University                      | 17   | University of Michigan- Ann Arbor               |
| 17   | University of California- Davis               | 19   | University of Rochester                         |
| 17   | University of California- Los Angeles         | 20   | University of Nebraska College of Medicine      |
| 21   | Duke University                               | 20   | University of Pittsburgh                        |
| 21   | Mich. State U. Coll. Of Osteopathic Medicine  | 22   | Michigan State University                       |
| 21   | Southern Illinois University- Springfield     | 23   | Brown University                                |
| 24   | Dartmouth Medical School                      | 23   | Medical University of South Carolina            |
| 24   | East Tennessee State University               | 23   | University of Missouri- Columbia                |
| 26   | SUNY- Stony Brook                             | 26   | Indiana University- Indianapolis                |
| 26   | University of Michigan- Ann Arbor             | 26   | Johns Hopkins University                        |
| 28   | Brown University                              | 26   | University of California- Davis                 |
| 28   | Mayo Medical School                           | 26   | U. of Texas Southwestern Medical Center- Dallas |
| 28   | University of Pittsburgh                      | 26   | Yeshiva University                              |
| 28   | University of Virginia                        | 31   | Ohio State University                           |
| 32   | University of Maryland- Baltimore             | 31   | University of New Mexico                        |
| 32   | University of Pennsylvania                    | 31   | University of Pennsylvania                      |
| 32   | University of Vermont                         | 31   | University of Utah                              |
| 32   | West Virginia School of Osteopathic Medicine  | 35   | Mayo Medical School                             |
| 32   | Wright State University                       | 35   | University of Arkansas for Medical Sciences     |
| 37   | Baylor College of Medicine                    | 35   | University of California- San Diego             |
| 37   | Okla. State U. Coll. Of Osteopathic Medicine  | 35   | University of Maryland                          |
| 37   | Washington University in St. Louis            | 35   | University of Virginia                          |
| 37   | Yale University                               | 35   | Wake Forest University                          |
| 41   | Emory University                              | 41   | Duke University                                 |
| 41   | Jefferson Medical College                     | 41   | Tufts University                                |
| 41   | Medical College of Georgia                    | 43   | University of Alabama- Birmingham               |
| 41   | Medical College of Wisconsin                  | 43   | University of Connecticut                       |
| 41   | University of Alabama- Birmingham             | 43   | University of Kansas Medical Center             |
| 41   | University of Nebraska College of Medicine    | 43   | U. of N. Texas Health Sci. Center.              |
| 47   | UMDNJ- Robert Wood Johnson Medical School     | 43   | West Virginia School of Osteopathic Medicine    |
| 47   | University of Connecticut                     | 48   | Emory University                                |
| 47   | Wake Forest University                        | 49   | Medical College of Wisconsin                    |
| 50   | Cornell University                            | 49   | Vanderbilt University                           |
| 50   | Ohio State University                         |      |                                                 |
| 50   | University of Cincinnati                      |      |                                                 |
| 50   | University of Utah                            |      |                                                 |
| 50   | Yeshiva University                            |      |                                                 |

**eTable 2.** Patient and physician characteristics, according to a physician’s medical school research ranking. Values are numbers (percentages) unless stated otherwise

|                                             | USNWR ranking (research), 2002 |                | P-value |
|---------------------------------------------|--------------------------------|----------------|---------|
|                                             | Top 20                         | ≥21            |         |
| <b>Physician characteristics</b>            |                                |                |         |
| No of physicians                            | 4071                           | 26 251         | —       |
| Mean (SE) physician’s age                   | 47.9 (0.2)                     | 44.8 (0.08)    | <0.001  |
| Women                                       | 1217 (29.9)                    | 8243 (31.4)    | 0.17    |
| <b>Credentials</b>                          |                                |                |         |
| MD (allopathic)                             | 3968 (97.5)                    | 23 062 (87.9)  | <0.001  |
| DO (osteopathic)                            | 103 (2.5)                      | 3189 (12.1)    |         |
| <b>Patient characteristics</b>              |                                |                |         |
| No of Medicare hospital admissions, 2011-15 | 100 004                        | 896 212        | —       |
| Mean (SE) patient’s age                     | 76.0 (0.02)                    | 76.0 (0.08)    | 0.78    |
| Women                                       | 59 902 (59.9)                  | 535 756 (59.8) | 0.71    |
| <b>Race/ethnicity</b>                       |                                |                |         |
| White                                       | 80 403 (80.4)                  | 716 970 (80.0) | 0.07    |
| Black                                       | 12 400 (12.4)                  | 110 234 (12.3) | 0.85    |
| Hispanic                                    | 4100 (4.1)                     | 40 330 (4.5)   | 0.001   |
| Other races                                 | 3101 (3.1)                     | 28 678 (3.2)   | 0.30    |
| Mean (SE) of median household income (\$)   | 56 413 (101)                   | 56 277 (29)    | 0.21    |
| Medicaid status                             | 27 601 (27.6)                  | 254 524 (28.4) | 0.003   |
| <b>Comorbidities</b>                        |                                |                |         |
| Congestive heart failure                    | 29 591 (29.6)                  | 256 675 (28.6) | <0.001  |
| COPD                                        | 23 001 (23.0)                  | 203 440 (22.7) | 0.19    |
| Diabetes                                    | 26 181 (26.2)                  | 230 864 (25.8) | 0.04    |
| Hypertension                                | 51 992 (52.0)                  | 459 757 (51.3) | 0.01    |
| Chronic kidney disease                      | 30 821 (30.8)                  | 271 731 (30.3) | 0.03    |
| Ischemic heart disease                      | 33 901 (33.9)                  | 229 156 (33.4) | 0.03    |
| Cancer                                      | 10 220 (10.2)                  | 89 711 (10.0)  | 0.11    |
| Depression                                  | 21 921 (21.9)                  | 195 374 (21.8) | 0.29    |

**eTable 3.** Association between physician medical school ranking and patient outcomes, restricted to physicians who graduated from medical schools within 4 years of the 2002 rankings (i.e., 1997-2007)

| U.S. News & World Report ranking of medical school attended by physician |       | 30-day mortality rate            |                                  |             | 30-day readmission rate           |                                   |             | Part B spending                     |                                    |             |
|--------------------------------------------------------------------------|-------|----------------------------------|----------------------------------|-------------|-----------------------------------|-----------------------------------|-------------|-------------------------------------|------------------------------------|-------------|
|                                                                          |       | Adjusted mortality rate (95%CI)  | Adjusted risk difference (95%CI) | p-for-trend | Adjusted readmission rate (95%CI) | Adjusted risk difference (95%CI)  | p-for-trend | Adjusted spending (95%CI)           | Adjusted difference (95%CI)        | p-for-trend |
| Primary care                                                             | 1-10  | <b>10.2%</b><br>(9.6% to 10.7%)  | Reference                        | 0.35        | <b>15.8%</b><br>(15.2% to 16.4%)  | Reference                         | 0.053       | <b>\$1016</b><br>(\$991 to \$1040)  | Reference                          | 0.17        |
|                                                                          | 11-20 | <b>10.3%</b><br>(9.7% to 10.9%)  | <b>+0.1%</b><br>(-0.7% to +0.9%) |             | <b>15.8%</b><br>(15.2% to 16.5%)  | <b>+0.03%</b><br>(-0.8% to +0.9%) |             | <b>\$1099</b><br>(\$1070 to \$1128) | <b>+\$83</b><br>(+\$46 to +\$120)  |             |
|                                                                          | 21-30 | <b>10.6%</b><br>(9.9% to 11.3%)  | <b>+0.4%</b><br>(-0.5% to +1.3%) |             | <b>16.5%</b><br>(15.7% to 17.2%)  | <b>+0.7%</b><br>(-0.3% to +1.6%)  |             | <b>\$1055</b><br>(\$1024 to \$1086) | <b>+\$40</b><br>(-\$0.20 to +\$79) |             |
|                                                                          | 31-40 | <b>10.5%</b><br>(9.8% to 11.1%)  | <b>+0.3%</b><br>(-0.5% to +1.2%) |             | <b>15.6%</b><br>(14.9% to 16.3%)  | <b>-0.2%</b><br>(-1.1% to +0.7%)  |             | <b>\$1058</b><br>(\$1033 to \$1083) | <b>+\$43</b><br>(+\$8 to +\$77)    |             |
|                                                                          | 41-50 | <b>11.0%</b><br>(10.6% to 11.4%) | <b>+0.8%</b><br>(+0.1% to +1.6%) |             | <b>16.2%</b><br>(15.8% to 16.7%)  | <b>+0.4%</b><br>(-0.3% to +1.2%)  |             | <b>\$1046</b><br>(\$1026 to \$1066) | <b>+\$30</b><br>(-\$1 to +\$62)    |             |
|                                                                          | ≥50   | <b>10.5%</b><br>(10.4% to 10.6%) | <b>+0.3%</b><br>(-0.2% to +0.9%) |             | <b>16.3%</b><br>(16.2% to 16.4%)  | <b>+0.5%</b><br>(-0.1% to +1.1%)  |             | <b>\$1064</b><br>(\$1057 to \$1070) | <b>+\$48</b><br>(+\$22 to +\$74)   |             |
| Research                                                                 | 1-10  | <b>10.2%</b><br>(9.4% to 11.1%)  | Reference                        | 0.06        | <b>16.4%</b><br>(15.6% to 17.3%)  | Reference                         | 0.51        | <b>\$1053</b><br>(\$1018 to \$1088) | Reference                          | 0.052       |
|                                                                          | 11-20 | <b>9.8%</b><br>(9.3% to 10.4%)   | <b>-0.4%</b><br>(-1.4% to +0.6%) |             | <b>16.5%</b><br>(15.9% to 17.1%)  | <b>+0.05%</b><br>(-1.0% to +1.1%) |             | <b>\$1040</b><br>(\$1011 to \$1069) | <b>-\$14</b><br>(-\$57 to +\$29)   |             |
|                                                                          | 21-30 | <b>10.3%</b><br>(9.7% to 11.0%)  | <b>+0.1%</b><br>(-1.0% to +1.2%) |             | <b>16.1%</b><br>(15.5% to 16.8%)  | <b>-0.3%</b><br>(-1.4% to +0.7%)  |             | <b>\$1028</b><br>(\$998 to \$1058)  | <b>-\$25</b><br>(-\$72 to +\$21)   |             |
|                                                                          | 31-40 | <b>10.6%</b><br>(10.1% to 11.1%) | <b>+0.4%</b><br>(-0.6% to +1.4%) |             | <b>16.3%</b><br>(15.8% to 16.9%)  | <b>-0.1%</b><br>(-1.1% to +0.9%)  |             | <b>\$1077</b><br>(\$1051 to \$1103) | <b>+\$25</b><br>(-\$19 to +\$66)   |             |
|                                                                          | 41-50 | <b>11.0%</b><br>(10.6% to 11.5%) | <b>+0.8%</b><br>(-0.1% to +1.8%) |             | <b>15.8%</b><br>(15.3% to 16.3%)  | <b>-0.6%</b><br>(-1.6% to +0.4%)  |             | <b>\$1038</b><br>(\$1015 to \$1061) | <b>-\$15</b><br>(-\$57 to +\$26)   |             |
|                                                                          | ≥50   | <b>10.5%</b><br>(10.4% to 10.7%) | <b>+0.3%</b><br>(-0.6% to +1.2%) |             | <b>16.2%</b><br>(16.1% to 16.4%)  | <b>-0.2%</b><br>(-1.1% to +0.7%)  |             | <b>\$1066</b><br>(\$1059 to \$1072) | <b>+\$12</b><br>(-\$24 to +\$49)   |             |

Analysis of 343,362 (8,646), 337,245 (8,633) and 361,950 (8,685) hospitalizations (the number of physicians) for mortality, readmissions, and health spending, respectively. Adjusted for patient characteristics, physician characteristics, and hospital fixed effects. Standard errors were clustered at physician-level.

**eTable 4.** Association between physician medical school ranking and patient outcomes, using 2009 *U.S. News & World Report* rankings

| U.S. News & World Report ranking of medical school attended by physician |       | 30-day mortality rate            |                                    |             | 30-day readmission rate           |                                   |             | Part B spending                     |                                  |             |
|--------------------------------------------------------------------------|-------|----------------------------------|------------------------------------|-------------|-----------------------------------|-----------------------------------|-------------|-------------------------------------|----------------------------------|-------------|
|                                                                          |       | Adjusted mortality rate (95%CI)  | Adjusted risk difference (95%CI)   | p-for-trend | Adjusted readmission rate (95%CI) | Adjusted risk difference (95%CI)  | p-for-trend | Adjusted spending (95%CI)           | Adjusted difference (95%CI)      | p-for-trend |
| Primary care                                                             | 1-10  | <b>10.0%</b><br>(9.5% to 10.5%)  | Reference                          | 0.64        | <b>15.8%</b><br>(15.5% to 16.1%)  | Reference                         | 0.03        | <b>\$1016</b><br>(\$995 to \$1037)  | Reference                        | 0.01        |
|                                                                          | 11-20 | <b>10.3%</b><br>(9.8% to 10.8%)  | <b>-0.3%</b><br>(-0.7% to +0.1%)   |             | <b>15.7%</b><br>(15.4% to 16.1%)  | <b>-0.1%</b><br>(-0.5% to +0.4%)  |             | <b>\$1079</b><br>(\$1053 to \$1105) | <b>+\$0</b><br>(-\$20 to +\$19)  |             |
|                                                                          | 21-30 | <b>10.6%</b><br>(10.0% to 11.2%) | <b>+0.1%</b><br>(-0.4% to +0.5%)   |             | <b>16.1%</b><br>(15.7% to 16.4%)  | <b>+0.3%</b><br>(-0.2% to +0.7%)  |             | <b>\$1048</b><br>(\$1022 to \$1075) | <b>+\$31</b><br>(+\$10 to +\$52) |             |
|                                                                          | 31-40 | <b>10.3%</b><br>(9.8% to 10.9%)  | <b>+0.2%</b><br>(-0.2% to +0.7%)   |             | <b>15.9%</b><br>(15.5% to 16.2%)  | <b>+0.1%</b><br>(-0.4% to +0.5%)  |             | <b>\$1051</b><br>(\$1028 to \$1074) | <b>+\$5</b><br>(-\$15 to +\$24)  |             |
|                                                                          | 41-50 | <b>10.7%</b><br>(10.3% to 11.1%) | <b>+0.4%</b><br>(-0.04% to +0.8%)  |             | <b>16.1%</b><br>(15.8% to 16.4%)  | <b>+0.3%</b><br>(-0.1% to +0.7%)  |             | <b>\$1045</b><br>(\$1027 to \$1063) | <b>+\$12</b><br>(-\$6 to +\$33)  |             |
|                                                                          | ≥50   | <b>10.4%</b><br>(10.3% to 10.5%) | <b>+0.003%</b><br>(-0.3% to +0.3%) |             | <b>16.1%</b><br>(16.0% to 16.2%)  | <b>+0.3%</b><br>(-0.04% to +0.6%) |             | <b>\$1059</b><br>(\$1053 to \$1065) | <b>+\$19</b><br>(+\$5 to +\$33)  |             |
| Research                                                                 | 1-10  | <b>10.7%</b><br>(10.3% to 11.1%) | Reference                          | 0.99        | <b>15.8%</b><br>(15.4% to 16.2%)  | Reference                         | 0.34        | <b>\$1050</b><br>(\$1031 to \$1069) | Reference                        | <0.001      |
|                                                                          | 11-20 | <b>10.6%</b><br>(10.3% to 10.9%) | <b>-0.04%</b><br>(-0.5% to +0.4%)  |             | <b>16.0%</b><br>(15.7% to 16.4%)  | <b>+0.2%</b><br>(-0.3% to +0.7%)  |             | <b>\$1049</b><br>(\$1034 to \$1063) | <b>-\$1</b><br>(-\$24 to +\$22)  |             |
|                                                                          | 21-30 | <b>10.6%</b><br>(10.3% to 10.9%) | <b>-0.1%</b><br>(-0.6% to +0.4%)   |             | <b>16.0%</b><br>(15.7% to 16.3%)  | <b>+0.2%</b><br>(-0.4% to +0.7%)  |             | <b>\$1040</b><br>(\$1026 to \$1054) | <b>-\$10</b><br>(-\$34 to +\$14) |             |
|                                                                          | 31-40 | <b>10.6%</b><br>(10.4% to 10.9%) | <b>-0.02%</b><br>(-0.5% to +0.5%)  |             | <b>16.0%</b><br>(15.6% to 16.3%)  | <b>+0.2%</b><br>(-0.4% to +0.7%)  |             | <b>\$1044</b><br>(\$1029 to \$1059) | <b>-\$6</b><br>(-\$30 to +\$18)  |             |
|                                                                          | 41-50 | <b>10.9%</b><br>(10.5% to 11.2%) | <b>+0.2%</b><br>(-0.3% to +0.7%)   |             | <b>15.9%</b><br>(15.6% to 16.3%)  | <b>+0.1%</b><br>(-0.4% to +0.6%)  |             | <b>\$1060</b><br>(\$1043 to \$1077) | <b>+\$10</b><br>(-\$15 to +\$36) |             |
|                                                                          | ≥50   | <b>10.6%</b><br>(10.5% to 10.7%) | <b>-0.04%</b><br>(-0.5% to +0.4%)  |             | <b>16.1%</b><br>(16.0% to 16.1%)  | <b>+0.2%</b><br>(-0.2% to +0.7%)  |             | <b>\$1066</b><br>(\$1061 to \$1070) | <b>+\$16</b><br>(-\$4 to +\$36)  |             |

Analysis of 996,212 (30,322), 973,484 (30,310) and 1,047,103 (30,605) hospitalizations (the number of physicians) for mortality, readmissions, and health spending, respectively. Adjusted for patient characteristics, physician characteristics, and hospital fixed effects. Standard errors were clustered at physician-level.

**eTable 5.** Characteristics of patients treated by hospitalist physicians. Values are numbers (percentages) unless stated otherwise

(A) Primary care ranking

|                                             | USNWR ranking (primary care), 2002 |                | P-value |
|---------------------------------------------|------------------------------------|----------------|---------|
|                                             | Top 20                             | ≥21            |         |
| <b>Physician characteristics</b>            |                                    |                |         |
| No of physicians                            | 1464                               | 8957           | —       |
| Mean (SE) physician's age                   | 45.0 (0.3)                         | 43.7 (0.1)     | <0.001  |
| Women                                       | 567 (38.7)                         | 3036 (33.9)    | 0.01    |
| <b>Credentials</b>                          |                                    |                |         |
| MD (allopathic)                             | 1444 (98.6)                        | 7694 (85.9)    | <0.001  |
| DO (osteopathic)                            | 20 (1.4)                           | 1263 (14.1)    |         |
| <b>Patient characteristics</b>              |                                    |                |         |
| No of Medicare hospital admissions, 2011-15 | 47 661                             | 373 157        | —       |
| Mean (SE) patient's age                     | 75.6 (0.08)                        | 75.7 (0.02)    | 0.40    |
| Women                                       | 28 215 (59.2)                      | 221 282 (59.3) | 0.70    |
| <b>Race/ethnicity</b>                       |                                    |                |         |
| White                                       | 38 510 (80.8)                      | 300 765 (80.6) | 0.50    |
| Black                                       | 5290 (11.1)                        | 42 540 (11.4)  | 0.12    |
| Hispanic                                    | 2145 (4.5)                         | 17 538 (4.7)   | 0.14    |
| Other races                                 | 1716 (3.6)                         | 12 314 (3.3)   | 0.02    |
| Mean (SE) of median household income (\$)   | 57 059 (123)                       | 56 961 (34)    | 0.46    |
| Medicaid status                             | 13 154 (27.6)                      | 102 991 (27.6) | 0.88    |
| <b>Comorbidities</b>                        |                                    |                |         |
| Congestive heart failure                    | 14 537 (30.5)                      | 111 947 (30.0) | 0.08    |
| COPD                                        | 11 248 (23.6)                      | 88 065 (23.6)  | 0.81    |
| Diabetes                                    | 13 774 (28.9)                      | 104 857 (28.1) | 0.01    |
| Hypertension                                | 27 882 (58.5)                      | 214 938 (57.6) | 0.01    |
| Chronic kidney disease                      | 16 634 (34.9)                      | 125 754 (33.7) | <0.001  |
| Ischemic heart disease                      | 17 253 (36.2)                      | 133 217 (35.7) | 0.08    |
| Cancer                                      | 5243 (11.0)                        | 41 420 (11.1)  | 0.70    |
| Depression                                  | 11 486 (24.1)                      | 89 931 (24.1)  | 0.88    |

We compared physicians within the same hospital by fitting ordinary least square regression models adjusting for hospital fixed effects, and then calculating standard marginalization. Standard errors were clustered at physician level.

## (B) Research ranking

|                                             | USNWR ranking (primary care), 2002 |                | P-value |
|---------------------------------------------|------------------------------------|----------------|---------|
|                                             | Top 20                             | ≥21            |         |
| <b>Physician characteristics</b>            |                                    |                |         |
| No of physicians                            | 1289                               | 9132           | —       |
| Mean (SE) physician's age                   | 45.6 (0.3)                         | 43.7 (0.1)     | <0.001  |
| Women                                       | 442 (34.3)                         | 3160 (34.6)    | 0.86    |
| <b>Credentials</b>                          |                                    |                |         |
| MD (allopathic)                             | 1248 (96.8)                        | 7899 (86.5)    | <0.001  |
| DO (osteopathic)                            | 41 (3.2)                           | 1233 (13.5)    |         |
| <b>Patient characteristics</b>              |                                    |                |         |
| No of Medicare hospital admissions, 2011-15 | 40 852                             | 379 966        | —       |
| Mean (SE) patient's age                     | 75.6 (0.09)                        | 75.7 (0.02)    | 0.28    |
| Women                                       | 24 225 (59.3)                      | 225 320 (59.3) | 0.89    |
| <b>Race/ethnicity</b>                       |                                    |                |         |
| White                                       | 32 886 (80.5)                      | 306 253 (80.6) | 0.75    |
| Black                                       | 4698 (11.5)                        | 42 936 (11.3)  | 0.27    |
| Hispanic                                    | 1797 (4.4)                         | 17 585 (4.7)   | 0.14    |
| Other races                                 | 1471 (3.6)                         | 12 919 (3.4)   | 0.41    |
| Mean (SE) of median household income (\$)   | 57 109 (120)                       | 56 957 (35)    | 0.24    |
| Medicaid status                             | 11 234 (27.5)                      | 104 871 (27.6) | 0.79    |
| <b>Comorbidities</b>                        |                                    |                |         |
| Congestive heart failure                    | 12 542 (30.7)                      | 113 990 (30.0) | 0.04    |
| COPD                                        | 9764 (23.9)                        | 89 672 (23.6)  | 0.34    |
| Diabetes                                    | 11 765 (28.8)                      | 106 770 (28.1) | 0.01    |
| Hypertension                                | 23 776 (58.2)                      | 218 860 (57.6) | 0.17    |
| Chronic kidney disease                      | 14 176 (34.7)                      | 128 429 (33.8) | 0.01    |
| Ischemic heart disease                      | 14 748 (36.1)                      | 135 648 (35.7) | 0.23    |
| Cancer                                      | 4535 (11.1)                        | 42 176 (11.1)  | 0.88    |
| Depression                                  | 9845 (24.1)                        | 91 572 (24.1)  | 0.89    |

We compared physicians within the same hospital by fitting ordinary least square regression models adjusting for hospital fixed effects, and then calculating standard marginalization. Standard errors were clustered at physician level.

**eTable 6.** Association between physician medical school ranking and patient outcomes, patients treated by hospitalists

| U.S. News & World Report ranking of medical school attended by physician |       | 30-day mortality rate           |                                   |             | 30-day readmission rate           |                                   |             | Part B spending                   |                                  |             |
|--------------------------------------------------------------------------|-------|---------------------------------|-----------------------------------|-------------|-----------------------------------|-----------------------------------|-------------|-----------------------------------|----------------------------------|-------------|
|                                                                          |       | Adjusted mortality rate (95%CI) | Adjusted risk difference (95%CI)  | p-for-trend | Adjusted readmission rate (95%CI) | Adjusted risk difference (95%CI)  | p-for-trend | Adjusted spending (95%CI)         | Adjusted difference (95%CI)      | p-for-trend |
| Primary care                                                             | 1-10  | <b>9.9%</b><br>(9.4% to 10.3%)  | Reference                         | 0.70        | <b>13.3%</b><br>(12.8% to 13.8%)  | Reference                         | 0.002       | <b>\$970</b><br>(\$953 to \$988)  | Reference                        | 0.01        |
|                                                                          | 11-20 | <b>9.6%</b><br>(9.1% to 10.1%)  | <b>-0.3%</b><br>(-0.9% to +0.4%)  |             | <b>13.8%</b><br>(13.3% to 14.2%)  | <b>+0.5%</b><br>(-0.2% to +1.1%)  |             | <b>\$991</b><br>(\$968 to \$1014) | <b>+\$20</b><br>(-\$8 to +\$48)  |             |
|                                                                          | 21-30 | <b>10.1%</b><br>(9.6% to 10.6%) | <b>+0.2%</b><br>(-0.4% to +0.9%)  |             | <b>14.1%</b><br>(13.5% to 14.7%)  | <b>+0.8%</b><br>(+0.1% to +1.5%)  |             | <b>\$975</b><br>(\$954 to \$997)  | <b>+\$5</b><br>(-\$23 to +\$32)  |             |
|                                                                          | 31-40 | <b>10.0%</b><br>(9.4% to 10.5%) | <b>+0.1%</b><br>(-0.6% to +0.8%)  |             | <b>13.5%</b><br>(13.0% to 14.1%)  | <b>+0.2%</b><br>(-0.5% to +0.9%)  |             | <b>\$990</b><br>(\$969 to \$1011) | <b>+\$19</b><br>(-\$8 to +\$46)  |             |
|                                                                          | 41-50 | <b>9.8%</b><br>(9.4% to 10.1%)  | <b>-0.1%</b><br>(-0.7% to +0.5%)  |             | <b>14.1%</b><br>(13.7% to 14.4%)  | <b>+0.7%</b><br>(+0.2% to +1.3%)  |             | <b>\$975</b><br>(\$962 to \$989)  | <b>+\$4</b><br>(-\$17 to +\$26)  |             |
|                                                                          | ≥50   | <b>9.9%</b><br>(9.8% to 10.0%)  | <b>+0.03%</b><br>(-0.4% to +0.5%) |             | <b>14.1%</b><br>(14.0% to 14.2%)  | <b>+0.8%</b><br>(+0.3% to +1.3%)  |             | <b>\$996</b><br>(\$991 to \$1001) | <b>+\$25</b><br>(+\$7 to +\$44)  |             |
| Research                                                                 | 1-10  | <b>10.1%</b><br>(9.5% to 10.8%) | Reference                         | 0.40        | <b>13.9%</b><br>(13.3% to 14.6%)  | Reference                         | 0.10        | <b>\$979</b><br>(\$954 to \$1003) | Reference                        | 0.007       |
|                                                                          | 11-20 | <b>9.5%</b><br>(9.1% to 10.0%)  | <b>-0.6%</b><br>(-1.3% to +0.2%)  |             | <b>13.9%</b><br>(13.4% to 14.3%)  | <b>-0.1%</b><br>(-0.9% to +0.7%)  |             | <b>\$982</b><br>(\$963 to \$1000) | <b>+\$3</b><br>(-\$27 to +\$33)  |             |
|                                                                          | 21-30 | <b>9.7%</b><br>(9.2% to 10.2%)  | <b>-0.4%</b><br>(-1.2% to +0.4%)  |             | <b>13.6%</b><br>(13.1% to 14.1%)  | <b>-0.3%</b><br>(-1.2% to +0.5%)  |             | <b>\$970</b><br>(\$952 to \$987)  | <b>-\$9</b><br>(-\$39 to +\$21)  |             |
|                                                                          | 31-40 | <b>9.9%</b><br>(9.5% to 10.4%)  | <b>-0.2%</b><br>(-0.9% to +0.6%)  |             | <b>14.0%</b><br>(13.6% to 14.4%)  | <b>+0.05%</b><br>(-0.7% to +0.8%) |             | <b>\$986</b><br>(\$970 to \$1002) | <b>+\$7</b><br>(-\$22 to +\$36)  |             |
|                                                                          | 41-50 | <b>9.7%</b><br>(9.3% to 10.1%)  | <b>-0.4%</b><br>(-1.1% to +0.3%)  |             | <b>13.5%</b><br>(13.1% to 13.9%)  | <b>-0.4%</b><br>(-1.2% to +0.4%)  |             | <b>\$965</b><br>(\$950 to \$980)  | <b>-\$14</b><br>(-\$43 to +\$14) |             |
|                                                                          | ≥50   | <b>9.9%</b><br>(9.8% to 10.0%)  | <b>-0.2%</b><br>(-0.9% to +0.4%)  |             | <b>14.1%</b><br>(14.0% to 14.2%)  | <b>+0.2%</b><br>(-0.5% to +0.9%)  |             | <b>\$997</b><br>(\$992 to \$1003) | <b>+\$18</b><br>(-\$7 to +\$44)  |             |

Analysis of 420,816 (10,421), 415,561 (10,424) and 444,147 (10,481) hospitalizations (the number of hospitalists) for mortality, readmissions, and health spending, respectively. Adjusted for patient characteristics, physician characteristics, and hospital fixed effects. Standard errors were clustered at physician-level.



**eTable 7.** Association between physician medical school ranking and patient outcomes, attributing patient outcomes to physicians billed the largest number of evaluation-and-management claims

| U.S. News & World Report ranking of medical school attended by physician |       | 30-day mortality rate           |                                   |             | 30-day readmission rate           |                                   |             | Part B spending                     |                                  |             |
|--------------------------------------------------------------------------|-------|---------------------------------|-----------------------------------|-------------|-----------------------------------|-----------------------------------|-------------|-------------------------------------|----------------------------------|-------------|
|                                                                          |       | Adjusted mortality rate (95%CI) | Adjusted risk difference (95%CI)  | p-for-trend | Adjusted readmission rate (95%CI) | Adjusted risk difference (95%CI)  | p-for-trend | Adjusted spending (95%CI)           | Adjusted risk difference (95%CI) | p-for-trend |
| Primary care                                                             | 1-10  | <b>10.2%</b><br>(9.8% to 10.5%) | Reference                         | 0.11        | <b>15.6%</b><br>(15.3% to 16.0%)  | Reference                         | 0.01        | <b>\$1062</b><br>(\$1048 to \$1077) | Reference                        | <0.001      |
|                                                                          | 11-20 | <b>9.9%</b><br>(9.6% to 10.2%)  | <b>-0.3%</b><br>(-0.7% to +0.2%)  |             | <b>15.9%</b><br>(15.5% to 16.3%)  | <b>+0.3%</b><br>(-0.3% to +0.8%)  |             | <b>\$1070</b><br>(\$1055 to \$1084) | <b>+\$7</b><br>(-\$12 to +\$27)  |             |
|                                                                          | 21-30 | <b>10.2%</b><br>(9.9% to 10.5%) | <b>+0.05%</b><br>(-0.4% to +0.5%) |             | <b>15.6%</b><br>(15.2% to 16.0%)  | <b>-0.03%</b><br>(-0.6% to +0.5%) |             | <b>\$1058</b><br>(\$1044 to \$1072) | <b>-\$4</b><br>(-\$24 to +\$16)  |             |
|                                                                          | 31-40 | <b>9.9%</b><br>(9.5% to 10.3%)  | <b>-0.2%</b><br>(-0.8% to +0.3%)  |             | <b>15.6%</b><br>(15.1% to 16.0%)  | <b>-0.1%</b><br>(-0.6% to +0.5%)  |             | <b>\$1073</b><br>(\$1057 to \$1089) | <b>+\$10</b><br>(-\$11 to +\$32) |             |
|                                                                          | 41-50 | <b>9.9%</b><br>(9.7% to 10.1%)  | <b>-0.3%</b><br>(-0.7% to +0.2%)  |             | <b>16.2%</b><br>(15.9% to 16.4%)  | <b>+0.5%</b><br>(+0.1% to +1.0%)  |             | <b>\$1078</b><br>(\$1066 to \$1089) | <b>+\$15</b><br>(-\$3 to +\$33)  |             |
|                                                                          | ≥50   | <b>9.9%</b><br>(9.8% to 10.0%)  | <b>-0.3%</b><br>(-0.6% to +0.1%)  |             | <b>16.1%</b><br>(16.0% to 16.2%)  | <b>+0.4%</b><br>(+0.01% to +0.8%) |             | <b>\$1083</b><br>(\$1079 to \$1087) | <b>+\$21</b><br>(+\$6 to +\$36)  |             |
| Research                                                                 | 1-10  | <b>10.1%</b><br>(9.7% to 10.5%) | Reference                         | 0.83        | <b>15.9%</b><br>(15.5% to 16.4%)  | Reference                         | 0.047       | <b>\$1070</b><br>(\$1053 to \$1087) | Reference                        | 0.003       |
|                                                                          | 11-20 | <b>9.8%</b><br>(9.6% to 10.1%)  | <b>-0.3%</b><br>(-0.8% to +0.2%)  |             | <b>15.9%</b><br>(15.5% to 16.2%)  | <b>-0.1%</b><br>(-0.7% to +0.5%)  |             | <b>\$1064</b><br>(\$1051 to \$1077) | <b>-\$6</b><br>(-\$27 to +\$15)  |             |
|                                                                          | 21-30 | <b>9.9%</b><br>(9.5% to 10.2%)  | <b>-0.2%</b><br>(-0.7% to +0.3%)  |             | <b>15.4%</b><br>(15.1% to 15.8%)  | <b>-0.5%</b><br>(-1.1% to +0.1%)  |             | <b>\$1064</b><br>(\$1050 to \$1078) | <b>-\$6</b><br>(-\$27 to +\$16)  |             |
|                                                                          | 31-40 | <b>9.9%</b><br>(9.6% to 10.2%)  | <b>-0.2%</b><br>(-0.7% to +0.2%)  |             | <b>16.1%</b><br>(15.7% to 16.4%)  | <b>+0.1%</b><br>(-0.4% to +0.7%)  |             | <b>\$1083</b><br>(\$1070 to \$1096) | <b>+\$13</b><br>(-\$8 to +\$34)  |             |
|                                                                          | 41-50 | <b>10.1%</b><br>(9.8% to 10.3%) | <b>-0.04%</b><br>(-0.5% to +0.4%) |             | <b>15.9%</b><br>(15.6% to 16.2%)  | <b>-0.1%</b><br>(-0.6% to +0.5%)  |             | <b>\$1074</b><br>(\$1062 to \$1086) | <b>+\$4</b><br>(-\$17 to +\$24)  |             |
|                                                                          | ≥50   | <b>9.9%</b><br>(9.8% to 10.0%)  | <b>-0.2%</b><br>(-0.6% to +0.2%)  |             | <b>16.1%</b><br>(16.0% to 16.2%)  | <b>+0.1%</b><br>(-0.4% to +0.6%)  |             | <b>\$1082</b><br>(\$1078 to \$1086) | <b>+\$12</b><br>(-\$6 to +\$30)  |             |

Analysis of 811,341 (29,300), 795,141 (29,297) and 841,904 (29,513) hospitalizations (the number of physicians) for mortality, readmissions, and health spending, respectively. Adjusted for patient characteristics, physician characteristics, and hospital fixed effects. Standard errors were clustered at physician-level.

**eTable 8.** Association between physician medical school ranking and patient outcomes, attributing patient outcomes to physicians who billed the first evaluation-and-management claims

| U.S. News & World Report ranking of medical school attended by physician |       | 30-day mortality rate           |                                   |             | 30-day readmission rate           |                                    |             | Part B spending                     |                                  |             |
|--------------------------------------------------------------------------|-------|---------------------------------|-----------------------------------|-------------|-----------------------------------|------------------------------------|-------------|-------------------------------------|----------------------------------|-------------|
|                                                                          |       | Adjusted mortality rate (95%CI) | Adjusted risk difference (95%CI)  | p-for-trend | Adjusted readmission rate (95%CI) | Adjusted risk difference (95%CI)   | p-for-trend | Adjusted spending (95%CI)           | Adjusted risk difference (95%CI) | p-for-trend |
| Primary care                                                             | 1-10  | <b>9.6%</b><br>(9.3% to 10.0%)  | Reference                         | 0.48        | <b>15.7%</b><br>(15.3% to 16.0%)  | Reference                          | 0.10        | <b>\$1096</b><br>(\$1084 to \$1107) | Reference                        | <0.001      |
|                                                                          | 11-20 | <b>9.7%</b><br>(9.4% to 10.0%)  | <b>+0.04%</b><br>(-0.4% to +0.5%) |             | <b>15.9%</b><br>(15.6% to 16.3%)  | <b>+0.3%</b><br>(-0.3% to +0.8%)   |             | <b>\$1109</b><br>(\$1096 to \$1121) | <b>+\$13</b><br>(-\$3 to +\$29)  |             |
|                                                                          | 21-30 | <b>10.0%</b><br>(9.6% to 10.3%) | <b>+0.3%</b><br>(-0.1% to +0.8%)  |             | <b>16.0%</b><br>(15.6% to 16.5%)  | <b>+0.4%</b><br>(-0.2% to +1.0%)   |             | <b>\$1093</b><br>(\$1081 to \$1106) | <b>-\$2</b><br>(-\$19 to +\$14)  |             |
|                                                                          | 31-40 | <b>9.5%</b><br>(9.2% to 9.9%)   | <b>-0.1%</b><br>(-0.6% to +0.4%)  |             | <b>15.9%</b><br>(15.5% to 16.4%)  | <b>+0.3%</b><br>(-0.3% to +0.9%)   |             | <b>\$1097</b><br>(\$1082 to \$1111) | <b>+\$9</b><br>(-\$18 to +\$20)  |             |
|                                                                          | 41-50 | <b>9.6%</b><br>(9.4% to 9.8%)   | <b>-0.02%</b><br>(-0.4% to +0.4%) |             | <b>16.1%</b><br>(15.8% to 16.4%)  | <b>+0.5%</b><br>(-0.01% to +0.9%)  |             | <b>\$1107</b><br>(\$1099 to \$1116) | <b>+\$12</b><br>(-\$3 to +\$26)  |             |
|                                                                          | ≥50   | <b>9.6%</b><br>(9.6% to 9.7%)   | <b>-0.01%</b><br>(-0.4% to +0.3%) |             | <b>16.1%</b><br>(16.0% to 16.2%)  | <b>+0.4%</b><br>(+0.002% to +0.8%) |             | <b>\$1115</b><br>(\$1112 to \$1118) | <b>+\$19</b><br>(+\$7 to +\$31)  |             |
| Research                                                                 | 1-10  | <b>10.0%</b><br>(9.6% to 10.4%) | Reference                         | 0.23        | <b>16.2%</b><br>(15.7% to 16.6%)  | Reference                          | 0.50        | <b>\$1091</b><br>(\$1074 to \$1108) | Reference                        | 0.001       |
|                                                                          | 11-20 | <b>9.6%</b><br>(9.3% to 9.9%)   | <b>-0.4%</b><br>(-0.9% to +0.1%)  |             | <b>16.0%</b><br>(15.6% to 16.3%)  | <b>-0.2%</b><br>(-0.8% to +0.4%)   |             | <b>\$1103</b><br>(\$1092 to \$1114) | <b>+\$12</b><br>(-\$8 to +\$31)  |             |
|                                                                          | 21-30 | <b>9.7%</b><br>(9.4% to 10.0%)  | <b>-0.3%</b><br>(-0.8% to +0.2%)  |             | <b>15.6%</b><br>(15.2% to 16.0%)  | <b>-0.6%</b><br>(-1.2% to +0.04%)  |             | <b>\$1099</b><br>(\$1086 to \$1113) | <b>+\$8</b><br>(-\$13 to +\$29)  |             |
|                                                                          | 31-40 | <b>9.7%</b><br>(9.4% to 9.9%)   | <b>-0.3%</b><br>(-0.8% to +0.1%)  |             | <b>16.2%</b><br>(15.9% to 16.6%)  | <b>+0.1%</b><br>(-0.5% to +0.7%)   |             | <b>\$1111</b><br>(\$1100 to \$1122) | <b>+\$20</b><br>(+\$1 to +\$40)  |             |
|                                                                          | 41-50 | <b>9.7%</b><br>(9.4% to 9.9%)   | <b>-0.4%</b><br>(-0.8% to +0.1%)  |             | <b>15.9%</b><br>(15.5% to 16.2%)  | <b>-0.3%</b><br>(-0.9% to +0.3%)   |             | <b>\$1101</b><br>(\$1090 to \$1111) | <b>+\$10</b><br>(-\$9 to +\$30)  |             |
|                                                                          | ≥50   | <b>9.6%</b><br>(9.5% to 9.7%)   | <b>-0.4%</b><br>(-0.8% to +0.01%) |             | <b>16.1%</b><br>(16.0% to 16.2%)  | <b>-0.1%</b><br>(-0.6% to +0.4%)   |             | <b>\$1114</b><br>(\$1111 to \$1118) | <b>+\$24</b><br>(+\$7 to +\$41)  |             |

Analysis of 800,186 (28,947), 780,541 (29,055) and 828,179 (29,253) hospitalizations (the number of physicians) for mortality, readmissions, and health spending, respectively. Adjusted for patient characteristics, physician characteristics, and hospital fixed effects. Standard errors were clustered at physician-level.

**eTable 9.** Association between physician medical school ranking and patient outcomes, using logistic regression models

| U.S. News & World Report ranking of medical school attended by physician |       | 30-day mortality rate            |                                  |             | 30-day readmission rate           |                                  |             |
|--------------------------------------------------------------------------|-------|----------------------------------|----------------------------------|-------------|-----------------------------------|----------------------------------|-------------|
|                                                                          |       | Adjusted mortality rate (95%CI)  | Adjusted risk difference (95%CI) | p-for-trend | Adjusted readmission rate (95%CI) | Adjusted risk difference (95%CI) | p-for-trend |
| Primary care                                                             | 1-10  | <b>10.6%</b><br>(10.3% to 10.9%) | Reference                        | 1.00        | <b>15.6%</b><br>(15.3% to 16.0%)  | Reference                        | 0.005       |
|                                                                          | 11-20 | <b>10.6%</b><br>(10.3% to 11.0%) | <b>1.00</b><br>(0.94 to 1.06)    |             | <b>16.0%</b><br>(15.6% to 16.3%)  | <b>1.03</b><br>(0.99 to 1.07)    |             |
|                                                                          | 21-30 | <b>10.7%</b><br>(10.3% to 11.0%) | <b>1.00</b><br>(0.95 to 1.06)    |             | <b>15.8%</b><br>(15.5% to 16.2%)  | <b>1.01</b><br>(0.97 to 1.05)    |             |
|                                                                          | 31-40 | <b>10.7%</b><br>(10.3% to 11.1%) | <b>1.01</b><br>(0.95 to 1.07)    |             | <b>15.5%</b><br>(15.1% to 15.9%)  | <b>0.99</b><br>(0.95 to 1.03)    |             |
|                                                                          | 41-50 | <b>10.7%</b><br>(10.5% to 11.0%) | <b>1.01</b><br>(0.96 to 1.07)    |             | <b>16.1%</b><br>(15.9% to 16.4%)  | <b>1.04</b><br>(1.005 to 1.07)   |             |
|                                                                          | ≥50   | <b>10.6%</b><br>(10.6% to 10.7%) | <b>1.00</b><br>(0.96 to 1.05)    |             | <b>16.1%</b><br>(16.0% to 16.2%)  | <b>1.04</b><br>(1.01 to 1.07)    |             |
| Research                                                                 | 1-10  | <b>10.8%</b><br>(10.4% to 11.2%) | Reference                        | 0.68        | <b>16.0%</b><br>(15.6% to 16.5%)  | Reference                        | 0.30        |
|                                                                          | 11-20 | <b>10.4%</b><br>(10.1% to 10.6%) | <b>0.94</b><br>(0.89 to 1.0003)  |             | <b>15.9%</b><br>(15.6% to 16.3%)  | <b>0.99</b><br>(0.95 to 1.03)    |             |
|                                                                          | 21-30 | <b>10.7%</b><br>(10.4% to 11.0%) | <b>0.98</b><br>(0.92 to 1.05)    |             | <b>15.7%</b><br>(15.4% to 16.0%)  | <b>0.98</b><br>(0.94 to 1.02)    |             |
|                                                                          | 31-40 | <b>10.7%</b><br>(10.4% to 10.9%) | <b>0.98</b><br>(0.92 to 1.04)    |             | <b>16.1%</b><br>(15.8% to 16.4%)  | <b>1.01</b><br>(0.97 to 1.05)    |             |
|                                                                          | 41-50 | <b>10.8%</b><br>(10.5% to 11.0%) | <b>0.99</b><br>(0.93 to 1.05)    |             | <b>16.0%</b><br>(15.7% to 16.3%)  | <b>1.00</b><br>(0.97 to 1.04)    |             |
|                                                                          | ≥50   | <b>10.7%</b><br>(10.6% to 10.7%) | <b>0.98</b><br>(0.93 to 1.03)    |             | <b>16.1%</b><br>(16.0% to 16.2%)  | <b>1.00</b><br>(0.97 to 1.04)    |             |

Analysis of 994,504 (30,179) and 972,806 (30,221) hospitalizations (the number of physicians) for mortality and readmissions, respectively. Adjusted for patient characteristics, physician characteristics, and hospital fixed effects. Standard errors were clustered at physician-level.

**eTable 10.** Association between physician medical school ranking and Part B spending, using generalized linear model with log-link and normal distribution

| U.S. News & World Report ranking of medical school attended by physician |       | Adjusted Part B spending (95%CI)    | Adjusted risk difference (95%CI)  | p-for-trend |
|--------------------------------------------------------------------------|-------|-------------------------------------|-----------------------------------|-------------|
| Primary care                                                             | 1-10  | <b>\$1004</b><br>(\$982 to \$1028)  | Reference                         | <0.001      |
|                                                                          | 11-20 | <b>\$1051</b><br>(\$1024 to \$1077) | <b>+4.5%</b><br>(+1.2% to +8.1%)  |             |
|                                                                          | 21-30 | <b>\$1038</b><br>(\$1014 to \$1062) | <b>+3.3%</b><br>(-0.01% to +6.7%) |             |
|                                                                          | 31-40 | <b>\$1042</b><br>(\$1021 to \$1063) | <b>+3.7%</b><br>(+0.6% to +6.8%)  |             |
|                                                                          | 41-50 | <b>\$1051</b><br>(\$1034 to \$1067) | <b>+4.5%</b><br>(+1.7% to +7.5%)  |             |
|                                                                          | ≥50   | <b>\$1060</b><br>(\$1055 to \$1065) | <b>+5.5%</b><br>(+3.0% to +8.0%)  |             |
| Research                                                                 | 1-10  | <b>\$1037</b><br>(\$1012 to \$1062) | Reference                         | <0.001      |
|                                                                          | 11-20 | <b>\$1032</b><br>(\$1010 to \$1054) | <b>-0.4%</b><br>(-3.6% to +2.8%)  |             |
|                                                                          | 21-30 | <b>\$1019</b><br>(\$996 to \$1042)  | <b>-1.7%</b><br>(-4.9% to +1.5%)  |             |
|                                                                          | 31-40 | <b>\$1050</b><br>(\$1031 to \$1069) | <b>+1.2%</b><br>(-1.8% to +4.4%)  |             |
|                                                                          | 41-50 | <b>\$1045</b><br>(\$1025 to \$1065) | <b>+0.8%</b><br>(-2.3% to +4.0%)  |             |
|                                                                          | ≥50   | <b>\$1062</b><br>(\$1057 to \$1067) | <b>+2.4%</b><br>(-0.1% to +5.0%)  |             |

Analysis of 1,047,102 hospitalizations treated by 30,605 physicians. Adjusted for patient characteristics, physician characteristics, and hospital fixed effects. Standard errors were clustered at physician-level.

**eTable 11.** Stratified analysis by years since completion of residency programs\*

(A) Primary care ranking

| U.S. News & World Report ranking of medical school |       | 30-day mortality rate            |                                   |             | 30-day readmission rate           |                                   |             | Part B spending                     |                                   |             |
|----------------------------------------------------|-------|----------------------------------|-----------------------------------|-------------|-----------------------------------|-----------------------------------|-------------|-------------------------------------|-----------------------------------|-------------|
|                                                    |       | Adjusted mortality rate (95%CI)  | Adjusted risk difference (95%CI)  | p-for-trend | Adjusted readmission rate (95%CI) | Adjusted risk difference (95%CI)  | p-for-trend | Adjusted spending (95%CI)           | Adjusted risk difference (95%CI)  | p-for-trend |
| Year 1-10                                          | 1-10  | <b>9.6%</b><br>(9.1% to 10.1%)   | Reference                         | 0.04        | <b>15.9%</b><br>(15.4% to 16.4%)  | Reference                         | 0.01        | <b>\$996</b><br>(\$977 to \$1015)   | Reference                         | 0.30        |
|                                                    | 11-20 | <b>9.9%</b><br>(9.3% to 10.4%)   | <b>+0.3%</b><br>(-0.4% to +1.0%)  |             | <b>16.0%</b><br>(15.4% to 16.5%)  | <b>+0.1%</b><br>(-0.7% to +0.9%)  |             | <b>\$1058</b><br>(\$1037 to \$1079) | <b>+\$62</b><br>(+\$34 to +\$90)  |             |
|                                                    | 21-30 | <b>10.1%</b><br>(9.5% to 10.7%)  | <b>+0.5%</b><br>(-0.2% to +1.3%)  |             | <b>16.0%</b><br>(15.4% to 16.7%)  | <b>+0.2%</b><br>(-0.6% to +1.0%)  |             | <b>\$1025</b><br>(\$1001 to \$1049) | <b>+\$29</b><br>(-\$1 to +\$60)   |             |
|                                                    | 31-40 | <b>9.7%</b><br>(9.1% to 10.2%)   | <b>+0.1%</b><br>(-0.7% to +0.8%)  |             | <b>15.5%</b><br>(14.8% to 16.1%)  | <b>-0.4%</b><br>(-1.2% to +0.4%)  |             | <b>\$1022</b><br>(\$1000 to \$1044) | <b>+\$26</b><br>(-\$3 to +\$55)   |             |
|                                                    | 41-50 | <b>10.4%</b><br>(10.0% to 10.8%) | <b>+0.8%</b><br>(+0.2% to +1.4%)  |             | <b>16.3%</b><br>(15.9% to 16.7%)  | <b>+0.4%</b><br>(-0.2% to +1.1%)  |             | <b>\$1020</b><br>(\$1006 to \$1035) | <b>+\$25</b><br>(+\$1 to +\$48)   |             |
|                                                    | ≥50   | <b>10.1%</b><br>(10.0% to 10.2%) | <b>+0.5%</b><br>(+0.04% to +1.0%) |             | <b>16.4%</b><br>(16.2% to 16.5%)  | <b>+0.5%</b><br>(-0.05% to +1.0%) |             | <b>\$1029</b><br>(\$1024 to \$1034) | <b>+\$33</b><br>(+\$12 to +\$53)  |             |
| Year 11-20                                         | 1-10  | <b>10.6%</b><br>(10.0% to 11.2%) | Reference                         | 0.48        | <b>15.7%</b><br>(15.0% to 16.3%)  | Reference                         | 0.52        | <b>\$1041</b><br>(\$1015 to \$1068) | Reference                         | 0.003       |
|                                                    | 11-20 | <b>10.5%</b><br>(9.9% to 11.1%)  | <b>-0.1%</b><br>(-1.0% to +0.8%)  |             | <b>16.2%</b><br>(15.5% to 16.9%)  | <b>+0.5%</b><br>(-0.4% to +1.5%)  |             | <b>\$1037</b><br>(\$1006 to \$1069) | <b>-\$4</b><br>(-\$45 to +\$36)   |             |
|                                                    | 21-30 | <b>10.2%</b><br>(9.6% to 10.8%)  | <b>-0.4%</b><br>(-1.2% to +0.5%)  |             | <b>15.8%</b><br>(15.1% to 16.5%)  | <b>+0.1%</b><br>(-0.8% to +1.1%)  |             | <b>\$1046</b><br>(\$1017 to \$1076) | <b>+\$5</b><br>(-\$36 to +\$45)   |             |
|                                                    | 31-40 | <b>10.9%</b><br>(10.1% to 11.7%) | <b>+0.3%</b><br>(-0.7% to +1.3%)  |             | <b>16.0%</b><br>(15.3% to 16.8%)  | <b>+0.3%</b><br>(-0.7% to +1.3%)  |             | <b>\$1061</b><br>(\$1028 to \$1095) | <b>+\$20</b><br>(-\$23 to +\$63)  |             |
|                                                    | 41-50 | <b>10.7%</b><br>(10.3% to 11.2%) | <b>+0.2%</b><br>(-0.6% to +0.9%)  |             | <b>15.8%</b><br>(15.3% to 16.2%)  | <b>+0.1%</b><br>(-0.7% to +0.9%)  |             | <b>\$1069</b><br>(\$1048 to \$1090) | <b>+\$27</b><br>(-\$8 to +\$62)   |             |
|                                                    | ≥50   | <b>10.6%</b><br>(10.5% to 10.8%) | <b>+0.1%</b><br>(-0.6% to +0.7%)  |             | <b>16.0%</b><br>(15.9% to 16.2%)  | <b>+0.4%</b><br>(-0.3% to +1.1%)  |             | <b>\$1072</b><br>(\$1065 to \$1079) | <b>+\$31</b><br>(+\$3 to +\$59)   |             |
| Year ≥20                                           | 1-10  | <b>11.9%</b><br>(11.1% to 12.8%) | Reference                         | 0.01        | <b>15.5%</b><br>(14.8% to 16.2%)  | Reference                         | 0.08        | <b>\$1040</b><br>(\$1004 to \$1076) | Reference                         | <0.001      |
|                                                    | 11-20 | <b>11.8%</b><br>(11.1% to 12.5%) | <b>-0.1%</b><br>(-1.2% to +0.9%)  |             | <b>15.5%</b><br>(14.9% to 16.1%)  | <b>+0.02%</b><br>(-0.9% to +0.9%) |             | <b>\$1094</b><br>(\$1062 to \$1125) | <b>+\$54</b><br>(+\$8 to +\$99)   |             |
|                                                    | 21-30 | <b>11.8%</b><br>(11.2% to 12.5%) | <b>-0.1%</b><br>(-1.2% to +1.0%)  |             | <b>15.1%</b><br>(14.4% to 15.8%)  | <b>-0.4%</b><br>(-1.4% to +0.5%)  |             | <b>\$1061</b><br>(\$1029 to \$1093) | <b>+\$21</b><br>(-\$27 to +\$70)  |             |
|                                                    | 31-40 | <b>12.0%</b><br>(11.2% to 12.7%) | <b>+0.03%</b><br>(-1.1% to +1.2%) |             | <b>15.3%</b><br>(14.5% to 16.0%)  | <b>-0.2%</b><br>(-1.3% to +0.8%)  |             | <b>\$1115</b><br>(\$1083 to \$1146) | <b>+\$75</b><br>(+\$27 to +\$123) |             |
|                                                    | 41-50 | <b>11.4%</b><br>(11.0% to 11.9%) | <b>-0.5%</b><br>(-1.5% to +0.5%)  |             | <b>16.2%</b><br>(15.7% to 16.7%)  | <b>+0.7%</b><br>(-0.1% to +1.5%)  |             | <b>\$1085</b><br>(\$1065 to \$1105) | <b>+\$45</b><br>(+\$4 to +\$86)   |             |
|                                                    | ≥50   | <b>11.2%</b><br>(11.1% to 11.4%) | <b>-0.7%</b><br>(-1.6% to +0.2%)  |             | <b>15.8%</b><br>(15.6% to 16.0%)  | <b>+0.3%</b><br>(-0.4% to +1.0%)  |             | <b>\$1110</b><br>(\$1102 to \$1118) | <b>+\$70</b><br>(+\$32 to +\$108) |             |

\*Calculated using the data on when physicians graduated from medical schools, assuming that they underwent 3 years of residency programs.

(B) Research ranking

| U.S. News & World Report ranking of medical school |       | 30-day mortality rate            |                                  |             | 30-day readmission rate           |                                   |             | Part B spending                     |                                  |             |
|----------------------------------------------------|-------|----------------------------------|----------------------------------|-------------|-----------------------------------|-----------------------------------|-------------|-------------------------------------|----------------------------------|-------------|
|                                                    |       | Adjusted mortality rate (95%CI)  | Adjusted risk difference (95%CI) | p-for-trend | Adjusted readmission rate (95%CI) | Adjusted risk difference (95%CI)  | p-for-trend | Adjusted spending (95%CI)           | Adjusted risk difference (95%CI) | p-for-trend |
| Year 1-10                                          | 1-10  | <b>9.8%</b><br>(9.1% to 10.5%)   | Reference                        | 0.003       | <b>16.3%</b><br>(15.5% to 17.1%)  | Reference                         | 0.68        | <b>\$1028</b><br>(\$1000 to \$1056) | Reference                        | 0.02        |
|                                                    | 11-20 | <b>9.2%</b><br>(8.7% to 9.6%)    | <b>-0.6%</b><br>(-1.4% to +0.2%) |             | <b>16.3%</b><br>(15.7% to 16.8%)  | <b>-0.1%</b><br>(-1.0% to +0.9%)  |             | <b>\$998</b><br>(\$979 to \$1017)   | <b>-\$30</b><br>(-\$62 to +\$2)  |             |
|                                                    | 21-30 | <b>10.1%</b><br>(9.6% to 10.7%)  | <b>+0.4%</b><br>(-0.5% to +1.3%) |             | <b>16.2%</b><br>(15.7% to 16.8%)  | <b>-0.1%</b><br>(-1.1% to +0.8%)  |             | <b>\$1014</b><br>(\$992 to \$1036)  | <b>-\$14</b><br>(-\$48 to +\$21) |             |
|                                                    | 31-40 | <b>9.9%</b><br>(9.5% to 10.4%)   | <b>+0.2%</b><br>(-0.7% to +1.0%) |             | <b>16.0%</b><br>(15.5% to 16.5%)  | <b>-0.3%</b><br>(-1.2% to +0.6%)  |             | <b>\$1035</b><br>(\$1017 to \$1053) | <b>+\$7</b><br>(-\$25 to +\$39)  |             |
|                                                    | 41-50 | <b>10.4%</b><br>(10.0% to 10.8%) | <b>+0.6%</b><br>(-0.2% to +1.4%) |             | <b>16.0%</b><br>(15.5% to 16.5%)  | <b>-0.3%</b><br>(-1.2% to +0.6%)  |             | <b>\$1009</b><br>(\$991 to \$1028)  | <b>-\$19</b><br>(-\$51 to +\$14) |             |
|                                                    | ≥50   | <b>10.2%</b><br>(10.0% to 10.3%) | <b>+0.4%</b><br>(-0.3% to +1.1%) |             | <b>16.3%</b><br>(16.2% to 16.4%)  | <b>-0.01%</b><br>(-0.8% to +0.8%) |             | <b>\$1031</b><br>(\$1026 to \$1037) | <b>+\$3</b><br>(-\$26 to +\$32)  |             |
| Year 11-20                                         | 1-10  | <b>10.8%</b><br>(10.1% to 11.5%) | Reference                        | 0.99        | <b>16.3%</b><br>(15.6% to 17.1%)  | Reference                         | 0.87        | <b>\$1076</b><br>(\$1037 to \$1115) | Reference                        | 0.18        |
|                                                    | 11-20 | <b>10.5%</b><br>(10.0% to 11.0%) | <b>-0.3%</b><br>(-1.2% to +0.6%) |             | <b>16.0%</b><br>(15.4% to 16.6%)  | <b>-0.3%</b><br>(-1.3% to +0.6%)  |             | <b>\$1050</b><br>(\$1021 to \$1079) | <b>-\$26</b><br>(-\$74 to +\$22) |             |
|                                                    | 21-30 | <b>10.3%</b><br>(9.7% to 10.8%)  | <b>-0.5%</b><br>(-1.5% to +0.4%) |             | <b>15.6%</b><br>(14.9% to 16.2%)  | <b>-0.8%</b><br>(-1.8% to +0.3%)  |             | <b>\$1034</b><br>(\$1008 to \$1060) | <b>-\$42</b><br>(-\$89 to +\$4)  |             |
|                                                    | 31-40 | <b>10.9%</b><br>(10.4% to 11.5%) | <b>+0.1%</b><br>(-0.7% to +1.0%) |             | <b>16.1%</b><br>(15.5% to 16.8%)  | <b>-0.2%</b><br>(-1.2% to +0.8%)  |             | <b>\$1058</b><br>(\$1032 to \$1083) | <b>-\$18</b><br>(-\$64 to +\$28) |             |
|                                                    | 41-50 | <b>11.2%</b><br>(10.6% to 11.7%) | <b>+0.4%</b><br>(-0.5% to +1.3%) |             | <b>16.2%</b><br>(15.7% to 16.8%)  | <b>-0.1%</b><br>(-1.1% to +0.9%)  |             | <b>\$1095</b><br>(\$1071 to \$1120) | <b>+\$19</b><br>(-\$27 to +\$66) |             |
|                                                    | ≥50   | <b>10.6%</b><br>(10.4% to 10.7%) | <b>-0.2%</b><br>(-1.0% to +0.5%) |             | <b>16.0%</b><br>(15.8% to 16.1%)  | <b>-0.4%</b><br>(-1.2% to +0.5%)  |             | <b>\$1068</b><br>(\$1061 to \$1076) | <b>-\$8</b><br>(-\$48 to +\$33)  |             |
| Year ≥20                                           | 1-10  | <b>11.9%</b><br>(11.2% to 12.6%) | Reference                        | 0.04        | <b>15.1%</b><br>(14.4% to 15.9%)  | Reference                         | 0.04        | <b>\$1080</b><br>(\$1044 to \$1117) | Reference                        | 0.04        |
|                                                    | 11-20 | <b>11.5%</b><br>(10.9% to 12.1%) | <b>-0.4%</b><br>(-1.3% to +0.5%) |             | <b>15.7%</b><br>(15.1% to 16.2%)  | <b>+0.5%</b><br>(-0.4% to +1.5%)  |             | <b>\$1104</b><br>(\$1079 to \$1130) | <b>+\$24</b><br>(-\$21 to +\$69) |             |
|                                                    | 21-30 | <b>12.1%</b><br>(11.5% to 12.6%) | <b>+0.2%</b><br>(-0.7% to +1.1%) |             | <b>15.2%</b><br>(14.6% to 15.7%)  | <b>+0.04%</b><br>(-0.9% to +1.0%) |             | <b>\$1072</b><br>(\$1043 to \$1102) | <b>-\$8</b><br>(-\$54 to +\$38)  |             |
|                                                    | 31-40 | <b>11.3%</b><br>(10.8% to 11.8%) | <b>-0.6%</b><br>(-1.5% to +0.3%) |             | <b>15.9%</b><br>(15.3% to 16.4%)  | <b>+0.7%</b><br>(-0.2% to +1.6%)  |             | <b>\$1081</b><br>(\$1054 to \$1109) | <b>+\$1</b><br>(-\$45 to +\$48)  |             |
|                                                    | 41-50 | <b>11.2%</b><br>(10.8% to 11.8%) | <b>-0.7%</b><br>(-1.7% to +0.2%) |             | <b>16.0%</b><br>(15.4% to 16.6%)  | <b>+0.9%</b><br>(-0.1% to +1.8%)  |             | <b>\$1071</b><br>(\$1048 to \$1094) | <b>-\$9</b><br>(-\$52 to +\$34)  |             |
|                                                    | ≥50   | <b>11.3%</b><br>(11.1% to 11.5%) | <b>-0.6%</b><br>(-1.3% to +0.1%) |             | <b>15.8%</b><br>(15.7% to 16.0%)  | <b>+0.7%</b><br>(-0.1% to +1.5%)  |             | <b>\$1110</b><br>(\$1101 to \$1119) | <b>+\$30</b><br>(-\$9 to +\$69)  |             |

**eTable 12.** Association between physician medical school ranking and patient outcomes, comparing physicians across hospitals (without hospital fixed effects)

| U.S. News & World Report ranking of medical school attended by physician |       | 30-day mortality rate            |                                  |             | 30-day readmission rate           |                                   |             | Part B spending                     |                                     |             |
|--------------------------------------------------------------------------|-------|----------------------------------|----------------------------------|-------------|-----------------------------------|-----------------------------------|-------------|-------------------------------------|-------------------------------------|-------------|
|                                                                          |       | Adjusted mortality rate (95%CI)  | Adjusted risk difference (95%CI) | p-for-trend | Adjusted readmission rate (95%CI) | Adjusted risk difference (95%CI)  | p-for-trend | Adjusted spending (95%CI)           | Adjusted risk difference (95%CI)    | p-for-trend |
| Primary care                                                             | 1-10  | <b>10.2%</b><br>(9.9% to 10.5%)  | Reference                        | <0.001      | <b>14.9%</b><br>(14.5% to 15.2%)  | Reference                         | <0.001      | <b>\$915</b><br>(\$897 to \$934)    | Reference                           | <0.001      |
|                                                                          | 11-20 | <b>10.0%</b><br>(9.7% to 10.4%)  | <b>-0.2%</b><br>(-0.6% to +0.3%) |             | <b>15.7%</b><br>(15.4% to 16.1%)  | <b>+0.8%</b><br>(+0.4% to +1.4%)  |             | <b>\$986</b><br>(\$962 to \$1010)   | <b>+\$71</b><br>(+\$41 to +\$101)   |             |
|                                                                          | 21-30 | <b>10.5%</b><br>(10.1% to 10.8%) | <b>+0.2%</b><br>(-0.2% to +0.7%) |             | <b>16.1%</b><br>(15.7% to 16.5%)  | <b>+1.2%</b><br>(+0.7% to +1.7%)  |             | <b>\$1028</b><br>(\$1004 to \$1053) | <b>+\$113</b><br>(+\$82 to +\$144)  |             |
|                                                                          | 31-40 | <b>10.9%</b><br>(10.5% to 11.3%) | <b>+0.7%</b><br>(+0.2% to +1.2%) |             | <b>15.7%</b><br>(15.3% to 16.2%)  | <b>+0.9%</b><br>(+0.4% to +1.4%)  |             | <b>\$1016</b><br>(\$988 to \$1043)  | <b>+\$100</b><br>(+\$67 to +\$133)  |             |
|                                                                          | 41-50 | <b>10.7%</b><br>(10.5% to 10.9%) | <b>+0.5%</b><br>(+0.1% to +0.9%) |             | <b>15.9%</b><br>(15.7% to 16.2%)  | <b>+1.1%</b><br>(+0.7% to +1.5%)  |             | <b>\$1050</b><br>(\$1033 to \$1067) | <b>+\$134</b><br>(+\$109 to +\$159) |             |
|                                                                          | ≥50   | <b>10.7%</b><br>(10.6% to 10.8%) | <b>+0.5%</b><br>(+0.2% to +0.8%) |             | <b>16.2%</b><br>(16.1% to 16.3%)  | <b>+1.3%</b><br>(+1.0% to +1.7%)  |             | <b>\$1084</b><br>(\$1076 to \$1092) | <b>+\$169</b><br>(+\$148 to +\$189) |             |
| Research                                                                 | 1-10  | <b>10.4%</b><br>(10.0% to 10.9%) | Reference                        | <0.001      | <b>16.5%</b><br>(16.0% to 16.9%)  | Reference                         | 0.01        | <b>\$1029</b><br>(\$1000 to \$1058) | Reference                           | <0.001      |
|                                                                          | 11-20 | <b>10.1%</b><br>(9.9% to 10.4%)  | <b>-0.3%</b><br>(-0.8% to +0.2%) |             | <b>15.7%</b><br>(15.3% to 16.0%)  | <b>-0.8%</b><br>(-1.4% to -0.3%)  |             | <b>\$1004</b><br>(\$983 to \$1026)  | <b>-\$25</b><br>(-\$61 to +\$11)    |             |
|                                                                          | 21-30 | <b>10.6%</b><br>(10.2% to 10.9%) | <b>+0.1%</b><br>(-0.4% to +0.6%) |             | <b>15.5%</b><br>(15.1% to 15.8%)  | <b>-1.0%</b><br>(-1.6% to -0.5%)  |             | <b>\$994</b><br>(\$973 to \$1015)   | <b>-\$35</b><br>(-\$70 to +\$1)     |             |
|                                                                          | 31-40 | <b>10.3%</b><br>(10.0% to 10.6%) | <b>-0.1%</b><br>(-0.6% to +0.4%) |             | <b>15.9%</b><br>(15.6% to 16.2%)  | <b>-0.6%</b><br>(-1.1% to -0.04%) |             | <b>\$1015</b><br>(\$995 to \$1036)  | <b>-\$14</b><br>(-\$49 to +\$22)    |             |
|                                                                          | 41-50 | <b>10.6%</b><br>(10.3% to 10.9%) | <b>+0.1%</b><br>(-0.3% to +0.6%) |             | <b>15.7%</b><br>(15.4% to 16.0%)  | <b>-0.8%</b><br>(-1.3% to -0.2%)  |             | <b>\$1011</b><br>(\$993 to \$1030)  | <b>-\$18</b><br>(-\$52 to +\$16)    |             |
|                                                                          | ≥50   | <b>10.7%</b><br>(10.7% to 10.8%) | <b>+0.3%</b><br>(-0.1% to +0.7%) |             | <b>16.1%</b><br>(16.0% to 16.2%)  | <b>-0.3%</b><br>(-0.8% to +0.1%)  |             | <b>\$1084</b><br>(\$1076 to \$1091) | <b>+\$55</b><br>(+\$24 to +\$85)    |             |

Analysis of 996,216 (30,322), 973,488 (30,310) and 1,047,107 (30,605) hospitalizations (the number of physicians) for mortality, readmissions, and health spending, respectively. Adjusted for patient characteristics and physician characteristics. Standard errors were clustered at physician-level.

**eTable 13.** Association between a physician’s medical school ranking based on social mission score\* and patient outcomes/costs of care

| Ranking of medical school based on social mission score* | 30-day mortality rate            |                                   |             | 30-day readmission rate           |                                   |             | Part B spending                     |                                  |             |
|----------------------------------------------------------|----------------------------------|-----------------------------------|-------------|-----------------------------------|-----------------------------------|-------------|-------------------------------------|----------------------------------|-------------|
|                                                          | Adjusted mortality rate (95%CI)  | Adjusted risk difference (95%CI)  | p-for-trend | Adjusted readmission rate (95%CI) | Adjusted risk difference (95%CI)  | p-for-trend | Adjusted spending (95%CI)           | Adjusted risk difference (95%CI) | p-for-trend |
| 1-10                                                     | <b>10.5%</b><br>(10.3% to 10.8%) | Reference                         | 0.29        | <b>16.2%</b><br>(15.9% to 16.5%)  | Reference                         | 0.49        | <b>\$1063</b><br>(\$1048 to \$1079) | Reference                        | 0.36        |
| 11-20                                                    | <b>10.5%</b><br>(10.2% to 10.8%) | <b>-0.01%</b><br>(-0.4% to +0.4%) |             | <b>15.9%</b><br>(15.6% to 16.3%)  | <b>-0.3%</b><br>(-0.7% to +0.2%)  |             | <b>\$1048</b><br>(\$1034 to \$1062) | <b>-\$15</b><br>(-\$36 to +\$6)  |             |
| 21-30                                                    | <b>10.5%</b><br>(10.2% to 10.9%) | <b>-0.03%</b><br>(-0.5% to +0.4%) |             | <b>16.0%</b><br>(15.6% to 16.3%)  | <b>-0.2%</b><br>(-0.7% to +0.2%)  |             | <b>\$1051</b><br>(\$1036 to \$1067) | <b>-\$12</b><br>(-\$34 to +\$10) |             |
| 31-40                                                    | <b>10.8%</b><br>(10.4% to 11.1%) | <b>+0.2%</b><br>(-0.2% to +0.7%)  |             | <b>16.2%</b><br>(15.8% to 16.5%)  | <b>-0.04%</b><br>(-0.5% to +0.4%) |             | <b>\$1071</b><br>(\$1056 to \$1086) | <b>+\$7</b><br>(-\$14 to +\$29)  |             |
| 41-50                                                    | <b>10.4%</b><br>(10.0% to 10.8%) | <b>-0.1%</b><br>(-0.6% to +0.4%)  |             | <b>16.7%</b><br>(16.3% to 17.1%)  | <b>+0.5%</b><br>(-0.06% to +1.0%) |             | <b>\$1049</b><br>(\$1033 to \$1065) | <b>-\$14</b><br>(-\$37 to +\$8)  |             |
| ≥50                                                      | <b>10.7%</b><br>(10.6% to 10.8%) | <b>+0.1%</b><br>(-0.2% to +0.4%)  |             | <b>16.0%</b><br>(15.9% to 16.1%)  | <b>-0.2%</b><br>(-0.6% to +0.1%)  |             | <b>\$1062</b><br>(\$1058 to \$1067) | <b>-\$1</b><br>(-\$18 to +\$16)  |             |

\*Based on Mullan et al.

Analysis of 996,212 (30,322), 973,483 (30,310) and 1,047,103 (30,605) hospitalizations (the number of physicians) for mortality, readmissions, and health spending, respectively. Adjusted for patient characteristics and physician characteristics. Standard errors were clustered at physician-level.



**eTable 14.** Association between a physician’s medical school ranking based on National Institute of Health funding and patient outcomes/costs of care

| Ranking of medical school based on NIH funding | 30-day mortality rate            |                                   |             | 30-day readmission rate           |                                  |             | Part B spending                     |                                  |             |
|------------------------------------------------|----------------------------------|-----------------------------------|-------------|-----------------------------------|----------------------------------|-------------|-------------------------------------|----------------------------------|-------------|
|                                                | Adjusted mortality rate (95%CI)  | Adjusted risk difference (95%CI)  | p-for-trend | Adjusted readmission rate (95%CI) | Adjusted risk difference (95%CI) | p-for-trend | Adjusted spending (95%CI)           | Adjusted risk difference (95%CI) | p-for-trend |
| 1-10                                           | <b>10.7%</b><br>(10.4% to 11.1%) | Reference                         | 0.85        | <b>16.0%</b><br>(15.6% to 16.4%)  | Reference                        | 0.03        | <b>\$1030</b><br>(\$1011 to \$1049) | Reference                        | <0.001      |
| 11-20                                          | <b>10.8%</b><br>(10.5% to 11.1%) | <b>+0.04%</b><br>(-0.5% to +0.5%) |             | <b>15.7%</b><br>(15.3% to 16.0%)  | <b>-0.3%</b><br>(-0.8% to +0.2%) |             | <b>\$1044</b><br>(\$1029 to \$1059) | <b>+\$15</b><br>(-\$9 to +\$38)  |             |
| 21-30                                          | <b>10.4%</b><br>(10.1% to 10.7%) | <b>-0.4%</b><br>(-0.8% to +0.1%)  |             | <b>16.1%</b><br>(15.7% to 16.4%)  | <b>+0.1%</b><br>(-0.4% to +0.6%) |             | <b>\$1047</b><br>(\$1034 to \$1061) | <b>+\$18</b><br>(-\$5 to +\$41)  |             |
| 31-40                                          | <b>10.6%</b><br>(10.3% to 11.0%) | <b>-0.1%</b><br>(-0.6% to +0.4%)  |             | <b>15.8%</b><br>(15.5% to 16.2%)  | <b>-0.1%</b><br>(-0.7% to +0.3%) |             | <b>\$1061</b><br>(\$1046 to \$1075) | <b>+\$31</b><br>(+\$7 to +\$55)  |             |
| 41-50                                          | <b>10.8%</b><br>(10.5% to 11.1%) | <b>+0.04%</b><br>(-0.4% to +0.5%) |             | <b>15.8%</b><br>(15.5% to 16.1%)  | <b>-0.2%</b><br>(-0.7% to +0.3%) |             | <b>\$1044</b><br>(\$1029 to \$1060) | <b>+\$15</b><br>(-\$10 to +\$39) |             |
| ≥50                                            | <b>10.6%</b><br>(10.5% to 10.7%) | <b>-0.1%</b><br>(-0.5% to +0.3%)  |             | <b>16.1%</b><br>(16.0% to 16.2%)  | <b>+0.1%</b><br>(-0.3% to +0.6%) |             | <b>\$1067</b><br>(\$1063 to \$1072) | <b>+\$38</b><br>(+\$18 to +\$58) |             |

Analysis of 996,212 (30,322), 973,483 (30,310) and 1,047,103 (30,605) hospitalizations (the number of physicians) for mortality, readmissions, and health spending, respectively. Adjusted for patient characteristics and physician characteristics. Standard errors were clustered at physician-level.
